# Supplementary material for: Readiness for Advance Care Planning among 965 community-dwelling older adults in mainland China:A latent profile analysis
Source: Research Square preprint supplement (doi:10.21203/rs.3.rs-7554461/v1), 2025-11-13
Supplement: Supplementary file 1 [file 843b43dceea4d92e9bb7de25.pdf]

## Questionnaire A : Participants' General Characteristics Questionnaire

Instructions: Please read each item carefully, based on your actual situation, and then select the answer on the right, Tick "√". Please be sure to answer each question without missing items.

|           |                                                     |                                                   |
|-----------|-----------------------------------------------------|---------------------------------------------------|
| <b>1</b>  | <b>Age</b>                                          | _____ Years                                       |
| <b>2</b>  | <b>Gender</b>                                       | <input type="checkbox"/> Male                     |
|           |                                                     | <input type="checkbox"/> Female                   |
| <b>3</b>  | <b>Marital status</b>                               | <input type="checkbox"/> Single/Divorced/Widowed  |
|           |                                                     | <input type="checkbox"/> Married                  |
| <b>4</b>  | <b>Educational level</b>                            | <input type="checkbox"/> College and above        |
|           |                                                     | <input type="checkbox"/> High School              |
|           |                                                     | <input type="checkbox"/> Secondary school         |
|           |                                                     | <input type="checkbox"/> Primary school and below |
| <b>5</b>  | <b>Religion</b>                                     | <input type="checkbox"/> None                     |
|           |                                                     | <input type="checkbox"/> Religious beliefs        |
| <b>6</b>  | <b>Average monthly income</b>                       | <input type="checkbox"/> <2,000 RMB               |
|           |                                                     | <input type="checkbox"/> 2,001–5,000 RMB          |
|           |                                                     | <input type="checkbox"/> >5,001 RMB               |
| <b>7</b>  | <b>Living condition</b>                             | <input type="checkbox"/> Alone                    |
|           |                                                     | <input type="checkbox"/> Spouse                   |
|           |                                                     | <input type="checkbox"/> Others                   |
| <b>8</b>  | <b>Number of children</b>                           | <input type="checkbox"/> One or none              |
|           |                                                     | <input type="checkbox"/> Two                      |
|           |                                                     | <input type="checkbox"/> Three and more           |
| <b>9</b>  | <b>Chronic disease</b>                              | <input type="checkbox"/> Yes                      |
|           |                                                     | <input type="checkbox"/> No                       |
| <b>10</b> | <b>Self-assessment of health status</b>             | <input type="checkbox"/> Very good                |
|           |                                                     | <input type="checkbox"/> Good                     |
|           |                                                     | <input type="checkbox"/> Poor                     |
| <b>11</b> | <b>Hospitalization experience</b>                   | <input type="checkbox"/> Yes                      |
|           |                                                     | <input type="checkbox"/> No                       |
| <b>12</b> | <b>Bereavement experience</b>                       | <input type="checkbox"/> Yes                      |
|           |                                                     | <input type="checkbox"/> No                       |
| <b>13</b> | <b>Participation in the dying process of others</b> | <input type="checkbox"/> Yes                      |
|           |                                                     | <input type="checkbox"/> No                       |
| <b>14</b> | <b>Participation in medical decision-making</b>     | <input type="checkbox"/> Yes                      |
|           |                                                     | <input type="checkbox"/> No                       |
| <b>15</b> | <b>knowledge of ACP</b>                             | <input type="checkbox"/> Yes                      |
|           |                                                     | <input type="checkbox"/> No                       |
